# Supplementary material for: Size Effects of Microplastics on Embryos and Observation of Toxicity Kinetics in Larvae of Grass Carp (Ctenopharyngodon idella)
Source: MDPI journal article supplement (doi:10.3390/toxics10020076), 2022-02-07
Supplement: s1 [file s1]

# Supplementary Materials: Size Effects of Microplastics on Embryos and Observation of Toxicity Kinetics in Larvae of Grass Carp (*Ctenopharyngodon idella*)

Chaonan Zhang, Zhiheng Zuo, Qiujie Wang, Shaodan Wang, Liquan Lv and Jixing Zou

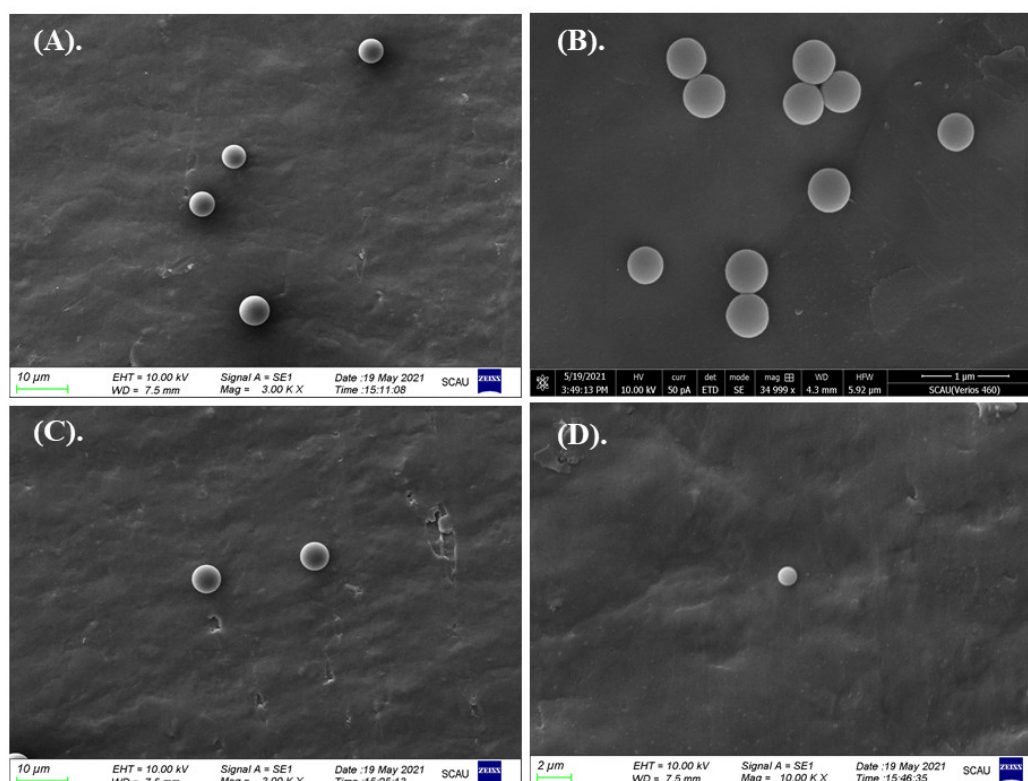

**Figure S1.** SEM figures of all kinds of polystyrene microspheres: 5 µm green fluorescent microplastics (A); 0.5 µm green fluorescent microplastics (B); 5 µm red fluorescent microplastics (C); 1 µm orange fluorescent microplastics (D).

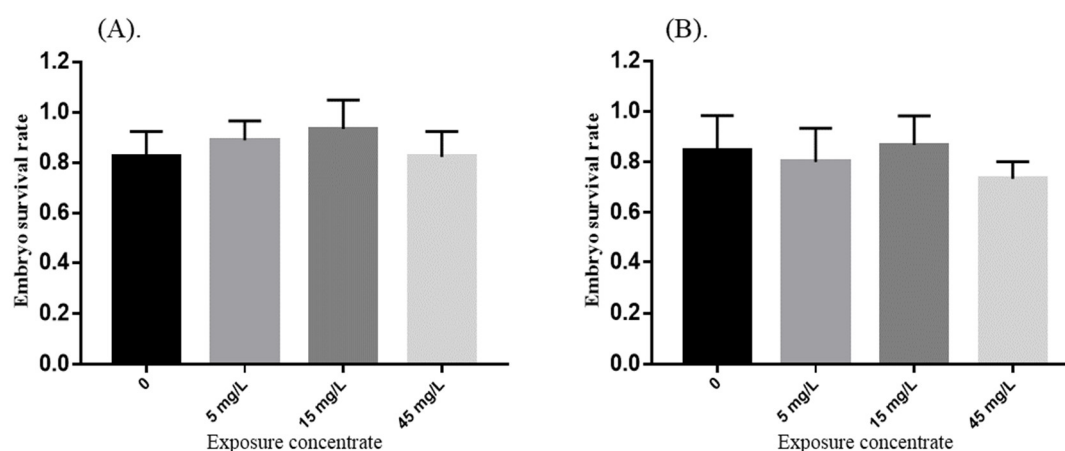

**Figure S2.** The survival rates of grass carp embryos among all groups when exposure to 8 µm (A) and 80 nm (B) microspheres.

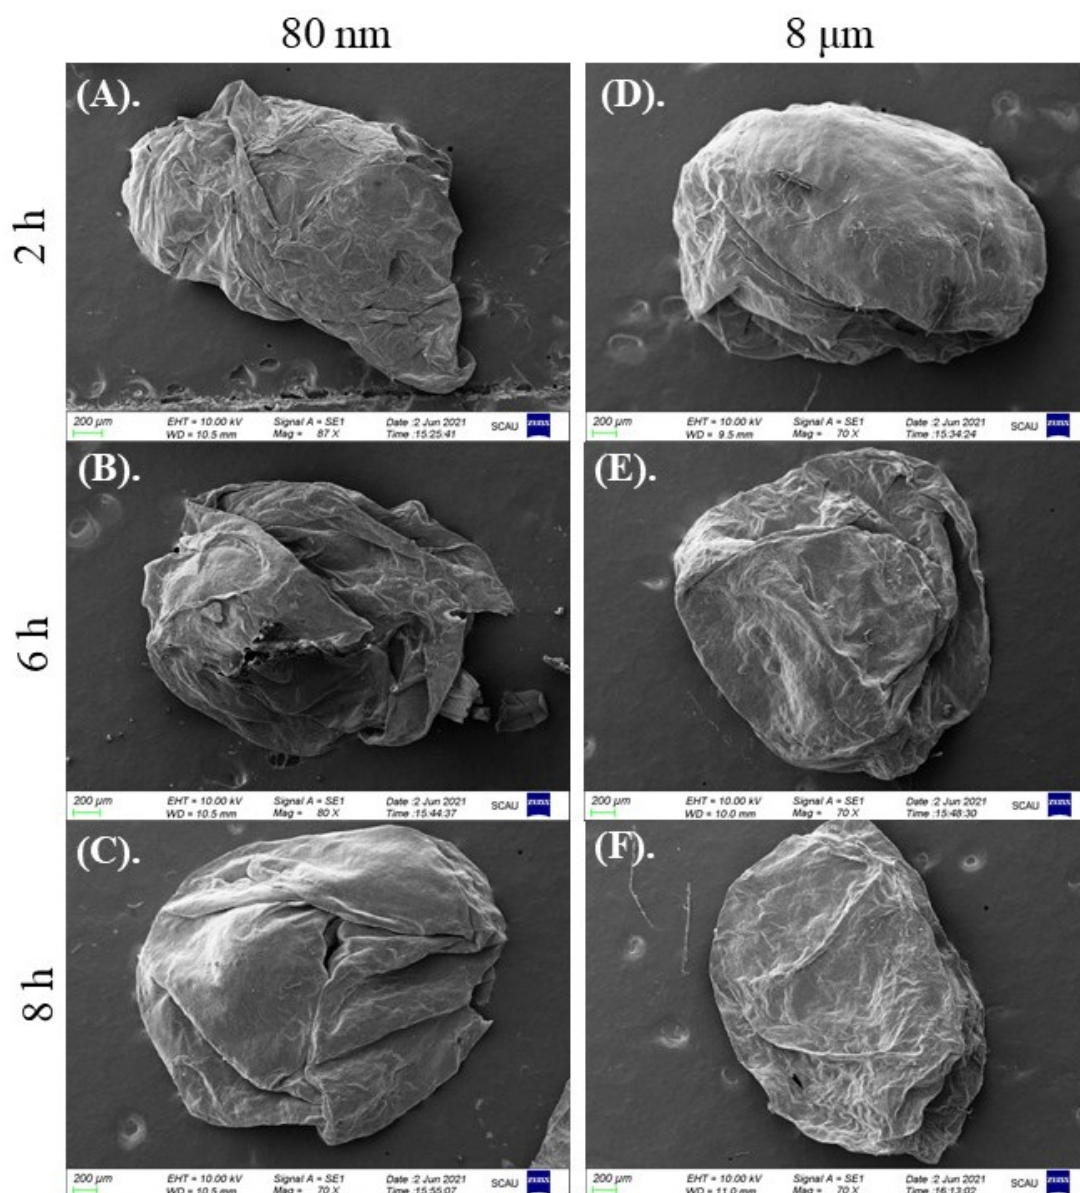

**Figure S3.** Chorion membranes of grass carp after drying. The size of microplastics and exposure time are shown in the figure.

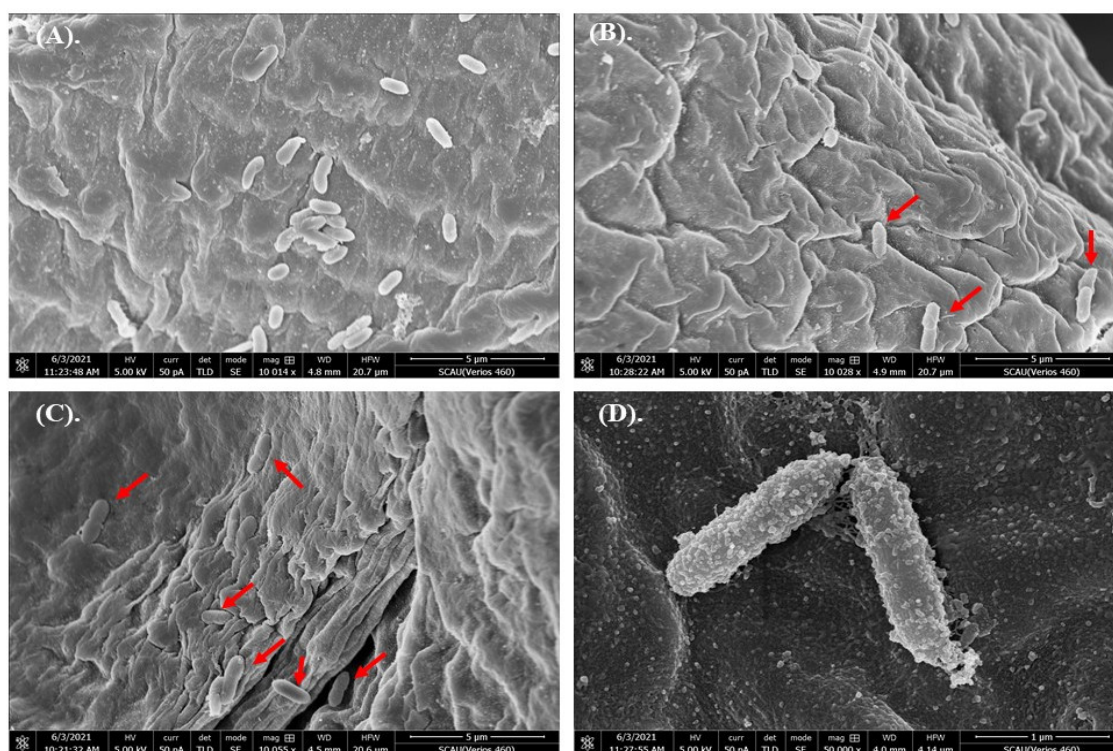

**Figure S4.** Rod-shaped bacteria were attached to some of the membrane surface. A-D show different forms of bacteria.

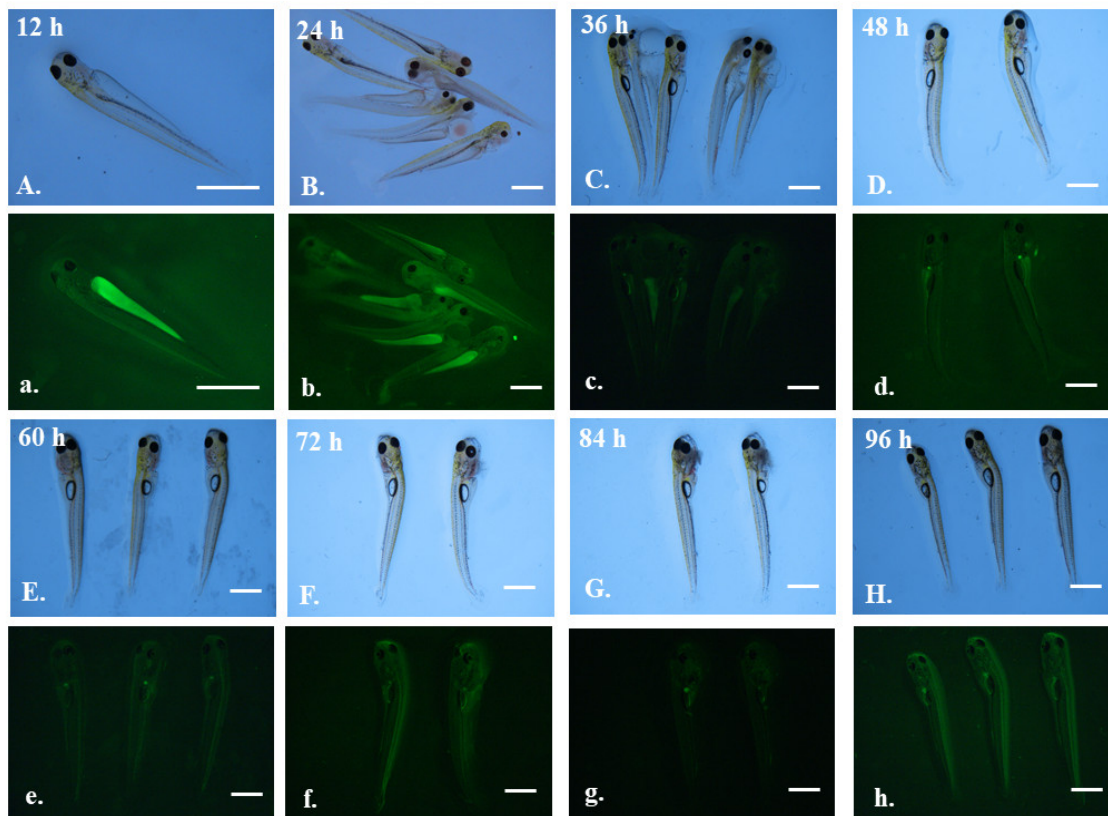

**Figure S5.** The control group in brightfield microscope (capital letters A–H) and green fluorescent microscope (lowercase letters a–h). Observation time was labeled in the figure. Scale bar = 2 mm.



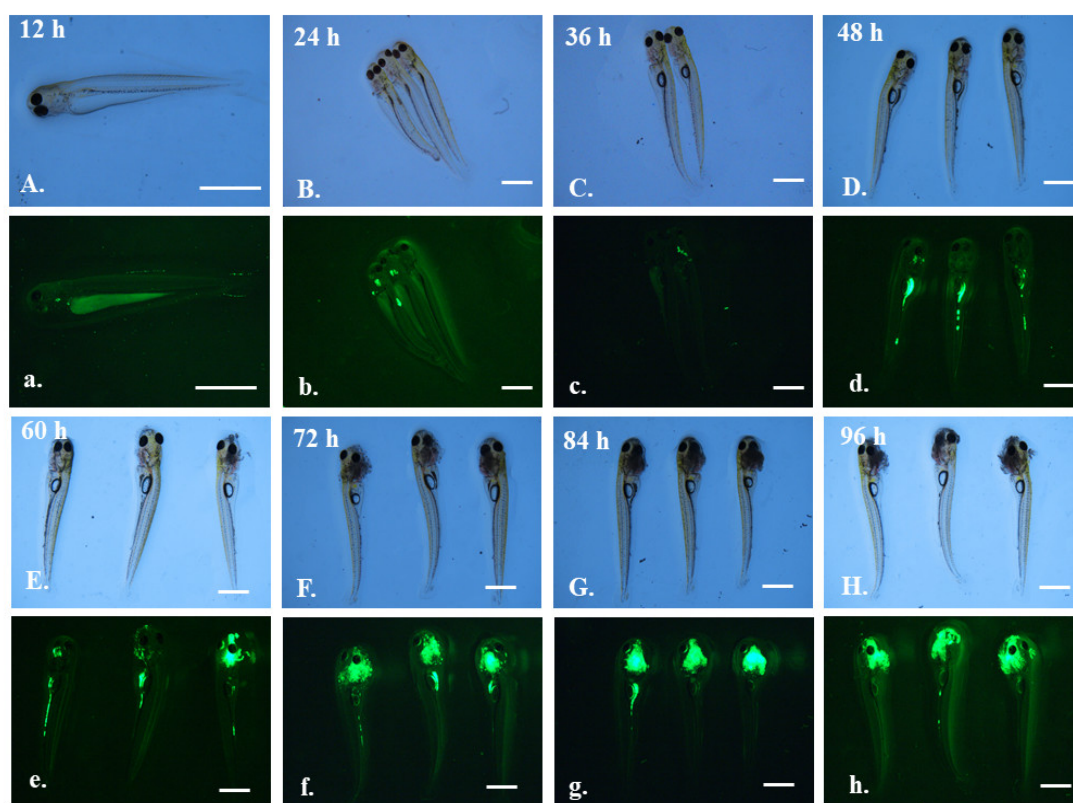

**Figure S6.** The larvae of grass carp after exposure to 0.5 µm green fluorescent microplastics. Photographs were taken under a brightfield microscope (capital letters A–H) and green fluorescent microscope (lowercase letters a–h). Observation time was labeled in the figure. Scale bar = 2 mm.

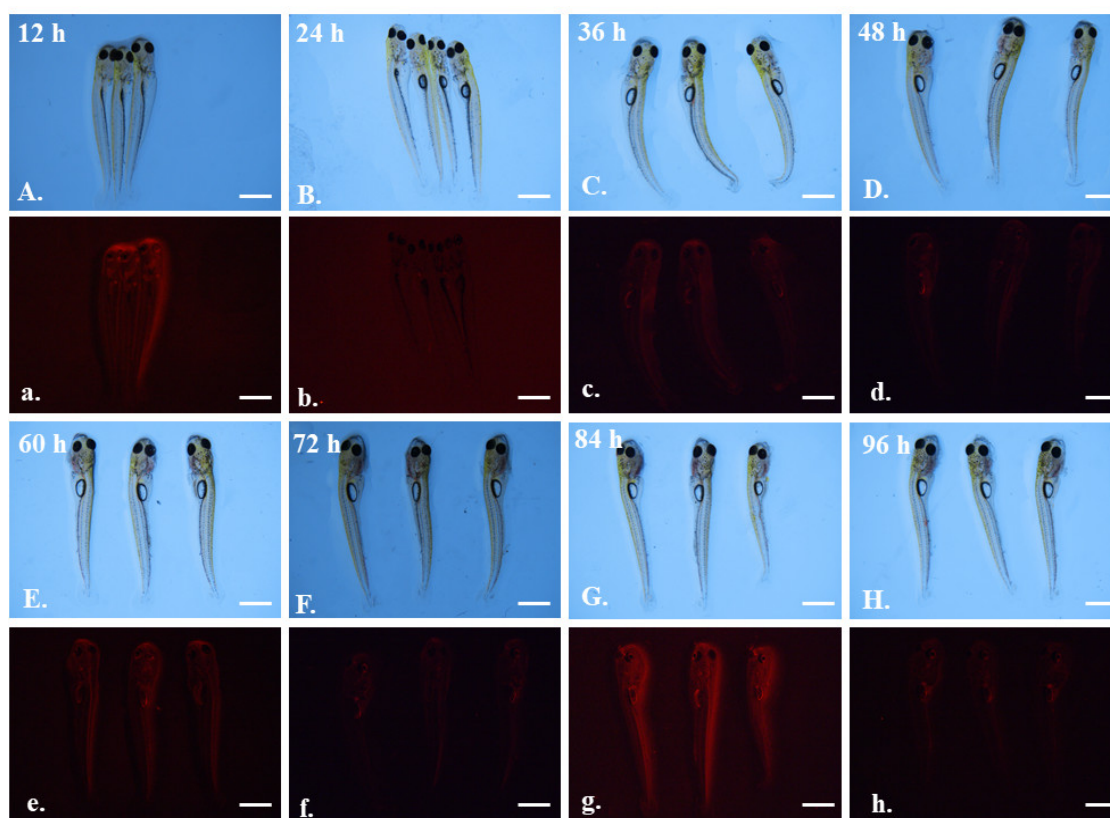

**Figure S7.** The control group in brightfield microscope (capital letters A–H) and red fluorescent microscope (lowercase letters a–h). Observation time was labeled in the figure. Scale bar = 2 mm.

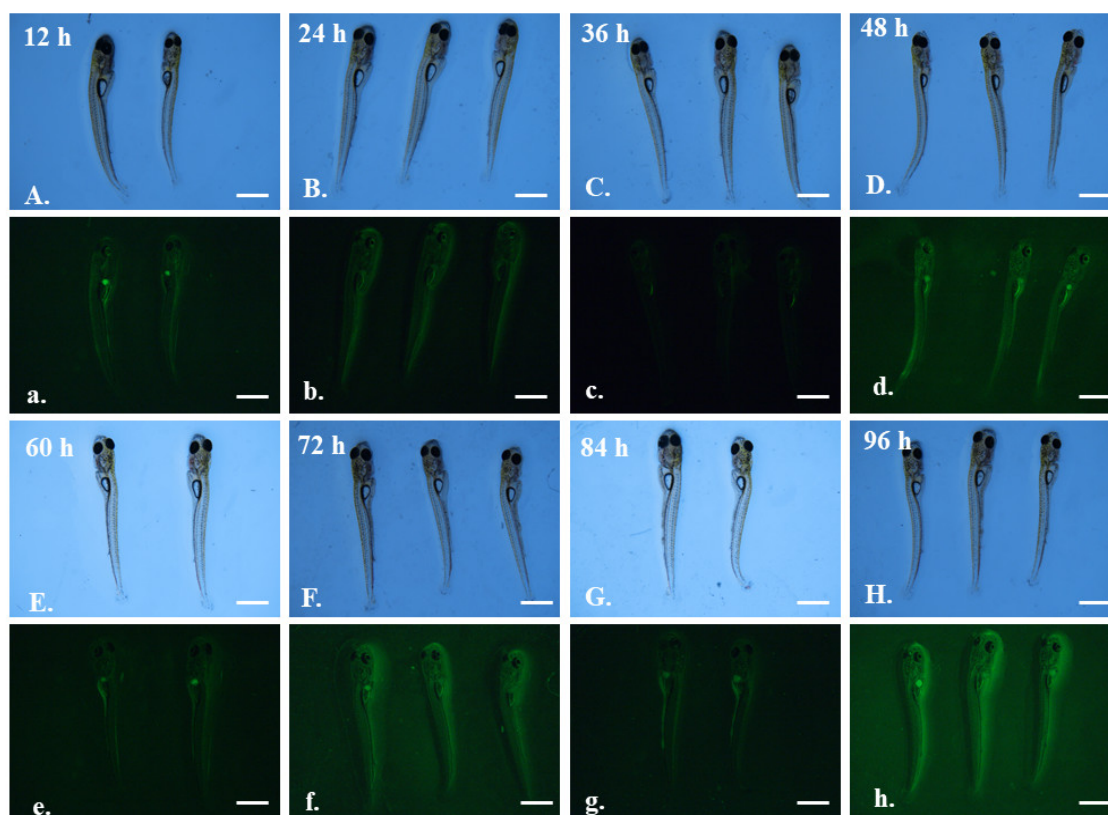

**Figure S8.** The control group during elimination test in brightfield microscope (capital letters A–H) and green fluorescent microscope (lowercase letters a–h). Observation time was labeled in the figure. Scale bar = 2 mm.

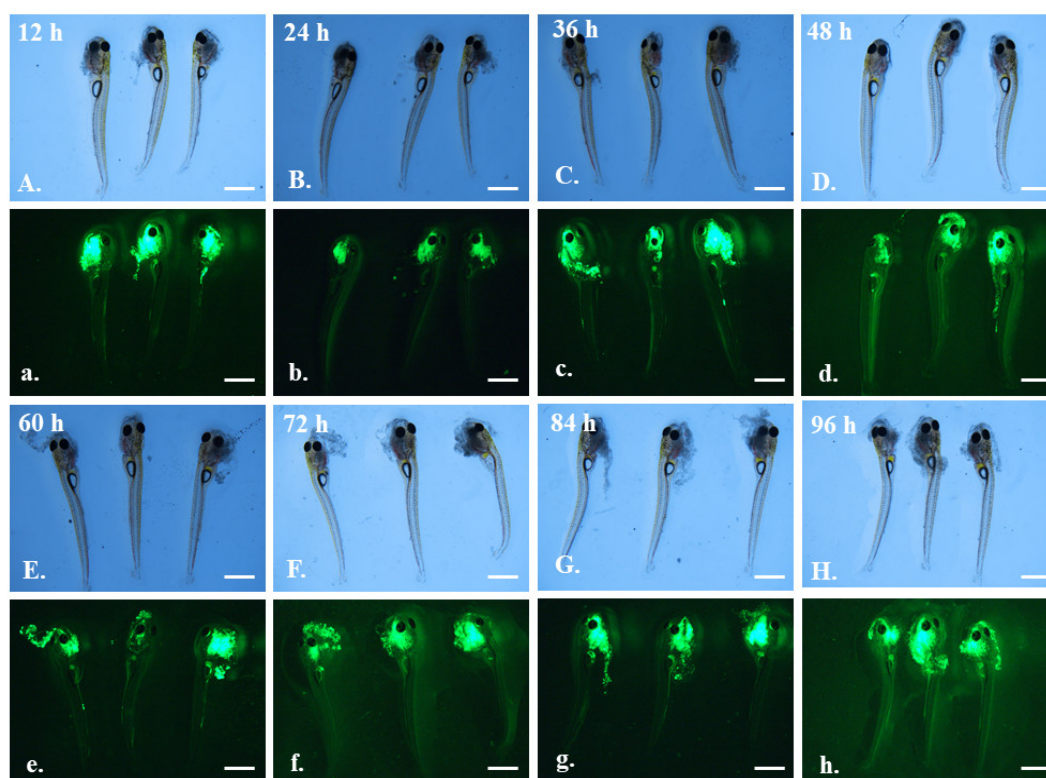

**Figure S9.** The larvae of grass carp after depurating from 5  $\mu\text{m}$  green fluorescent microplastics. Photographs were taken under a brightfield microscope (capital letters A–H) and green fluorescent microscope (lowercase letters a–h). Observation time was labeled in the figure. Scale bar = 2 mm.

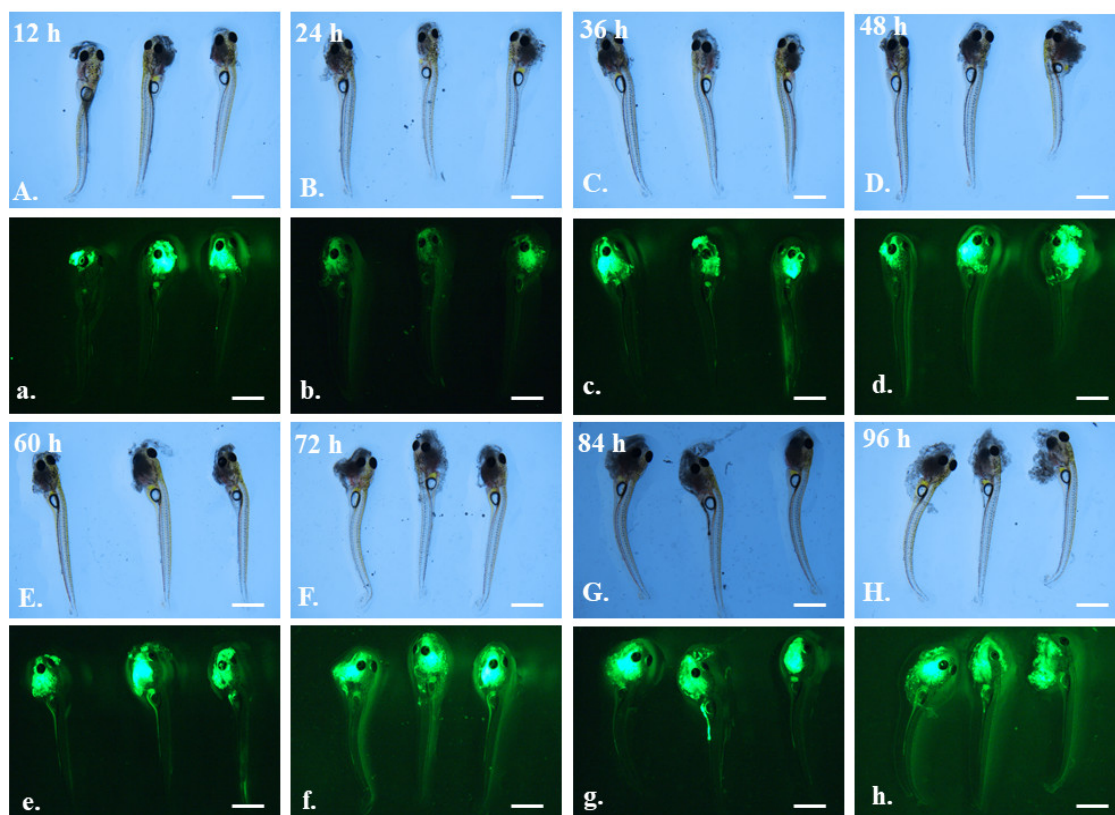

**Figure S10.** The larvae of grass carp after depurating from 0.5  $\mu\text{m}$  green fluorescent microplastics. Photographs were taken under a brightfield microscope (capital letters A–H) and green fluorescent microscope (lowercase letters a–h). Observation time was labeled in the figure. Scale bar = 2 mm.



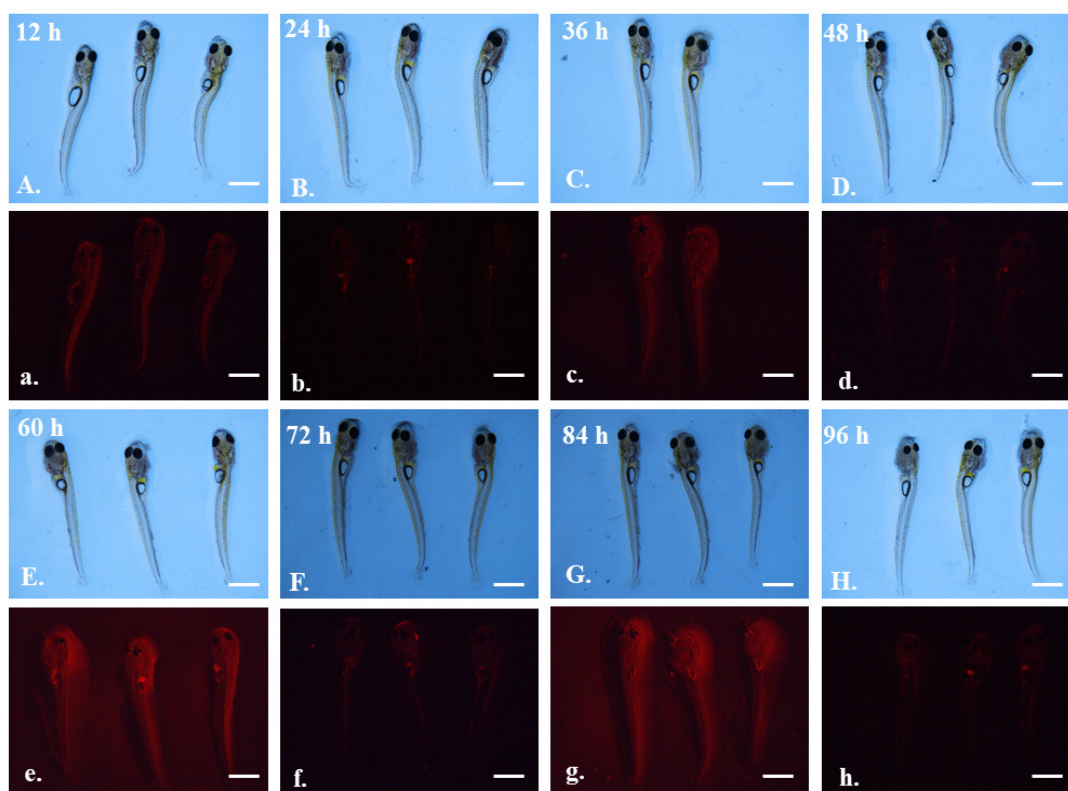

**Figure S11.** The control group during elimination test in brightfield microscope (capital letters A–H) and red fluorescent microscope (lowercase letters a–h). Observation time was labeled in the figure. Scale bar = 2 mm.

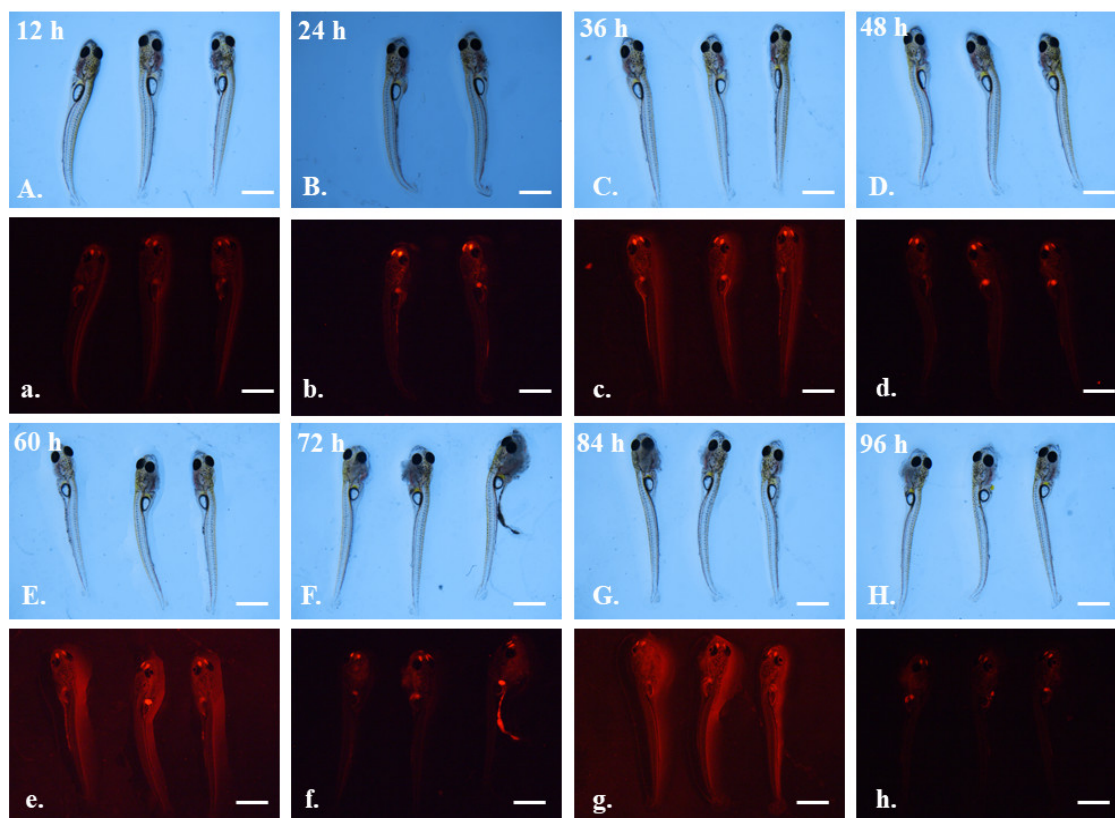

**Figure S12.** The larvae of grass carp after depurating from 1 µm red fluorescent microplastics. Photographs were taken under a brightfield microscope (capital letters A–H) and red fluorescent microscope (lowercase letters a–h). Observation time was labeled in the figure. Scale bar = 2 mm.

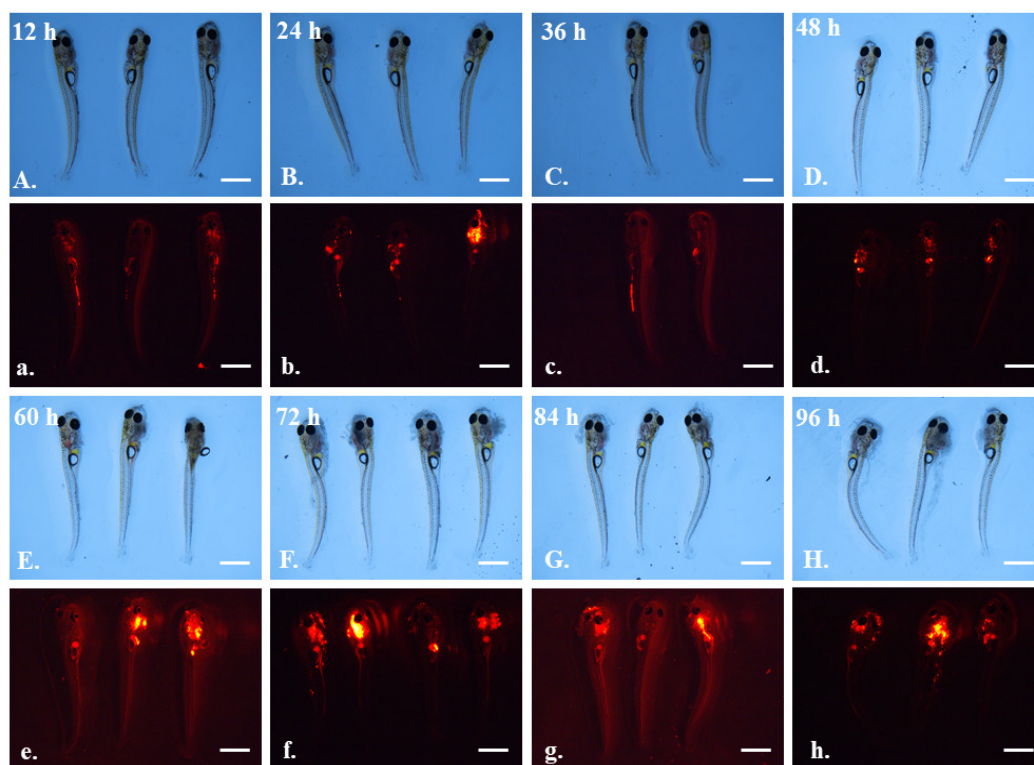

**Figure S13.** The larvae of grass carp after depurating from 5  $\mu$ m red fluorescent microplastics. Photographs were taken under a brightfield microscope (capital letters **A–H**) and red fluorescent microscope (lowercase letters **a–h**). Observation time was labeled in the figure. Scale bar = 2 mm.

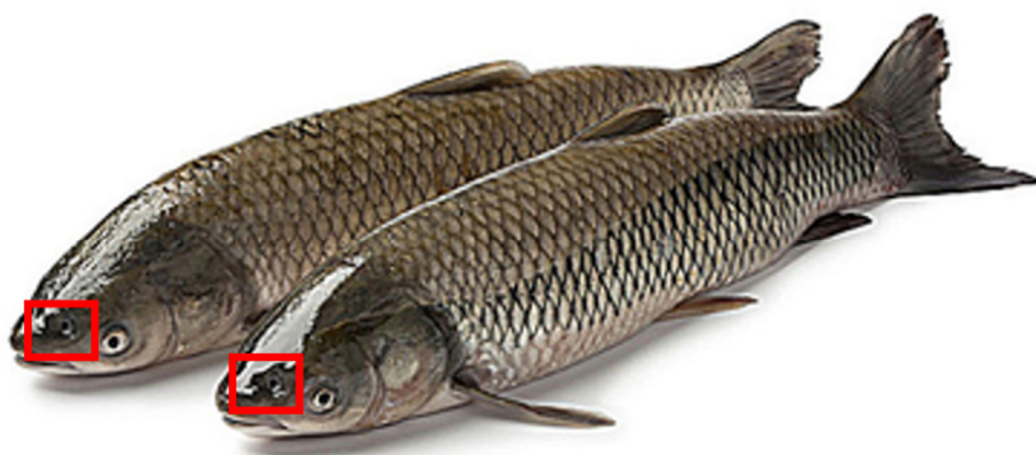

**Figure S14.** The appearance of adult grass carp. The area marked in the red box is the nasal cavity.
